# Supplementary material
Source: ML conference proceedings conference paper supplement (https://openreview.net/forum?id=BdvCo8RVlx)
Supplement: supplementary_material [file attachment]

$p = 100, m = 5$

■ Deep neural network   ■ Lasso   ■ LLSPIN  
■ Contextual linear model   ■ LassoNet   ■ Contextual lasso

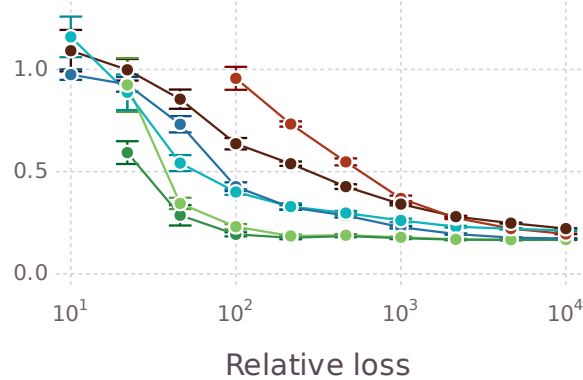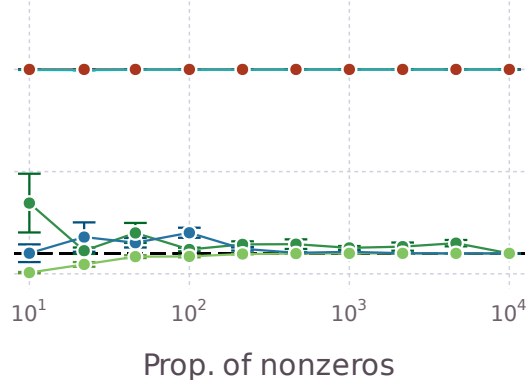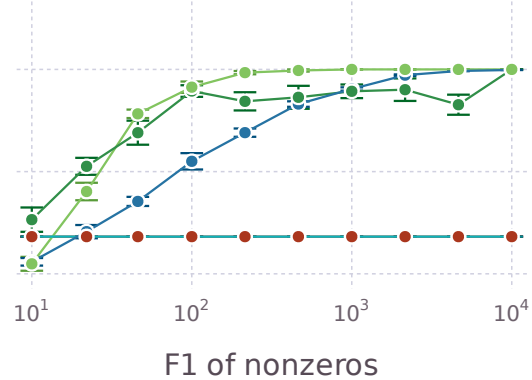

Sample size
