# Supplementary material
Source: ML conference proceedings conference paper supplement (https://openreview.net/forum?id=BdvCo8RVlx)
Supplement: supplementary_material [file attachment]

$p = 1000, m = 2$

■ Deep neural network   ■ Lasso   ■ LLSPIN  
■ Contextual linear model   ■ LassoNet   ■ Contextual lasso

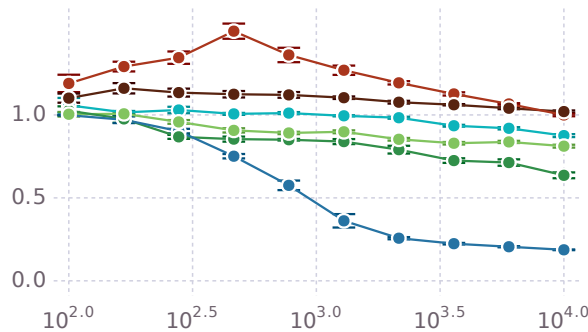

Relative loss

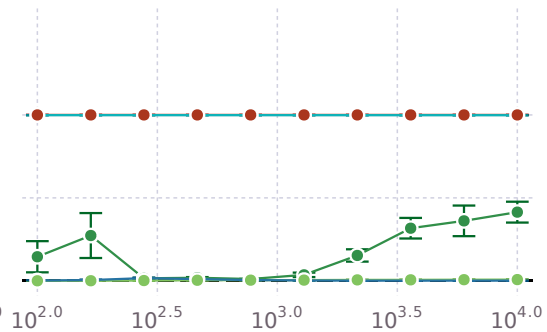

Prop. of nonzeros

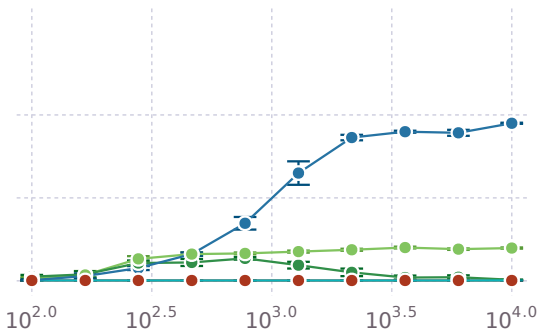

F1 of nonzeros

Sample size
