# Supplementary material
Source: ML conference proceedings conference paper supplement (https://openreview.net/forum?id=BdvCo8RVlx)
Supplement: supplementary_material [file attachment]

Intercept

Latitude

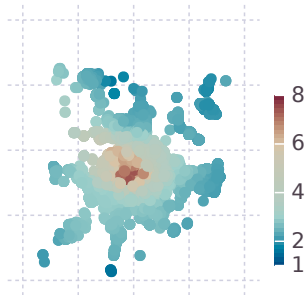

Longitude

Elevator

Latitude

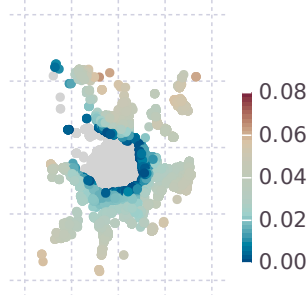

Longitude

Floor

Latitude

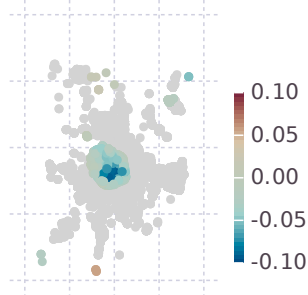

Longitude

Renovation condition

Latitude

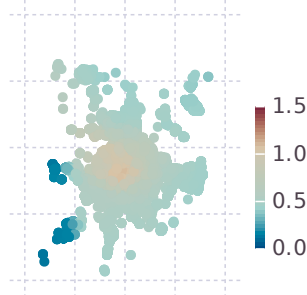

Longitude
