# Supplementary material
Source: ML conference proceedings conference paper supplement (https://openreview.net/forum?id=BdvCo8RVlx)

$\hat{f}(x)$

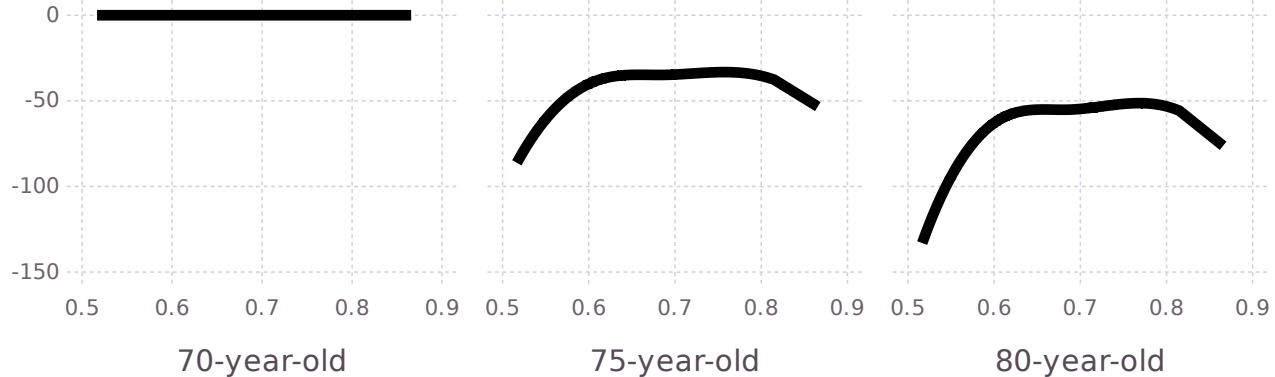

Detrended fluctuation analysis

Supplement: supplementary_material [file attachment]

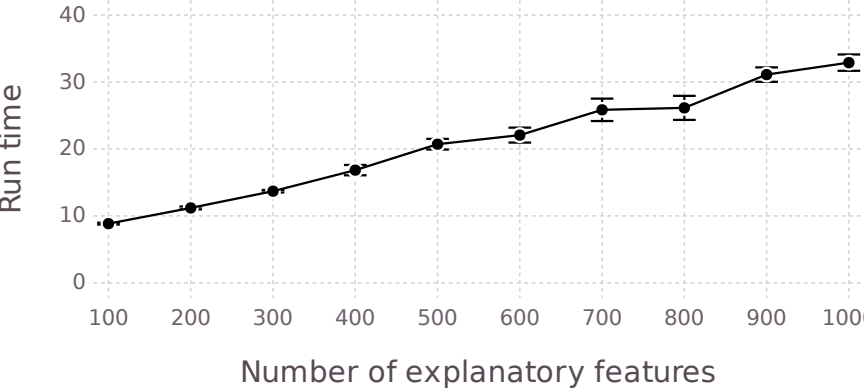

Supplement: supplementary_material [file attachment]

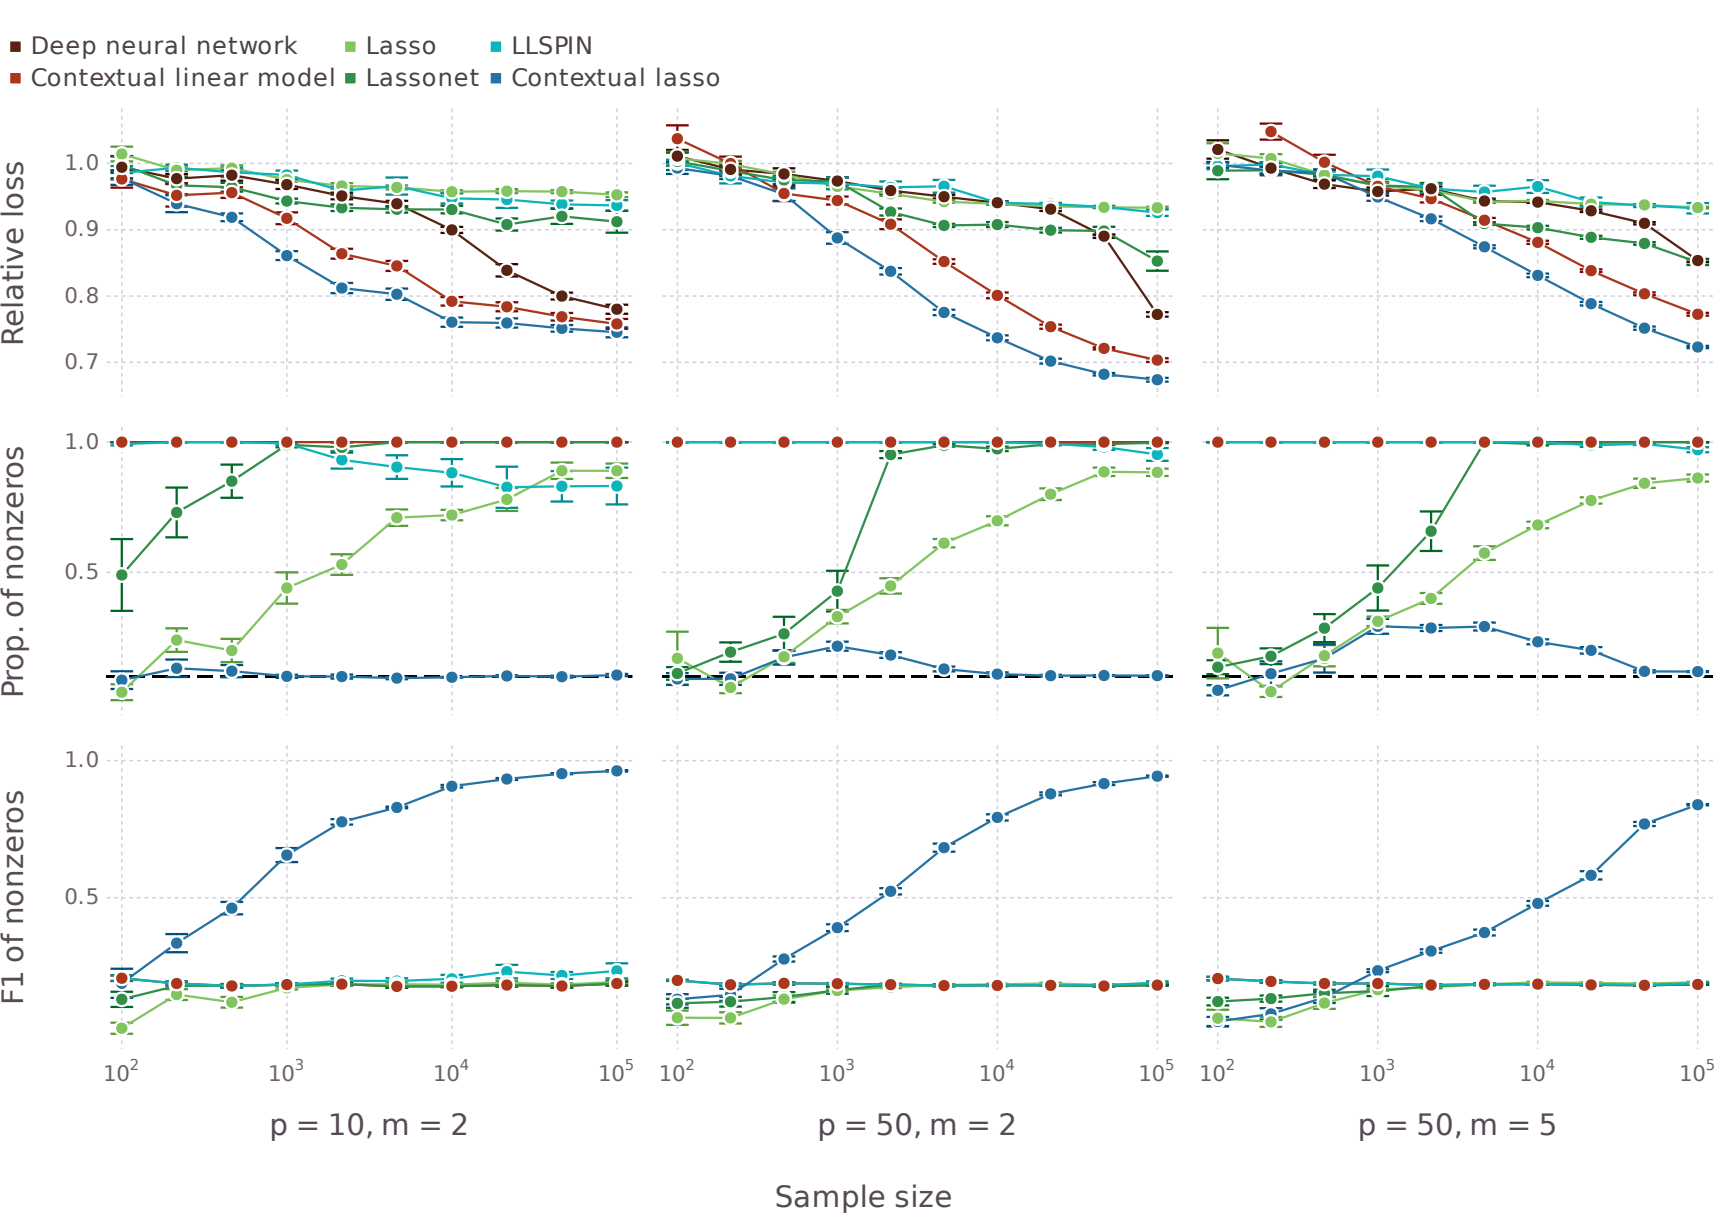

Supplement: supplementary_material [file attachment]

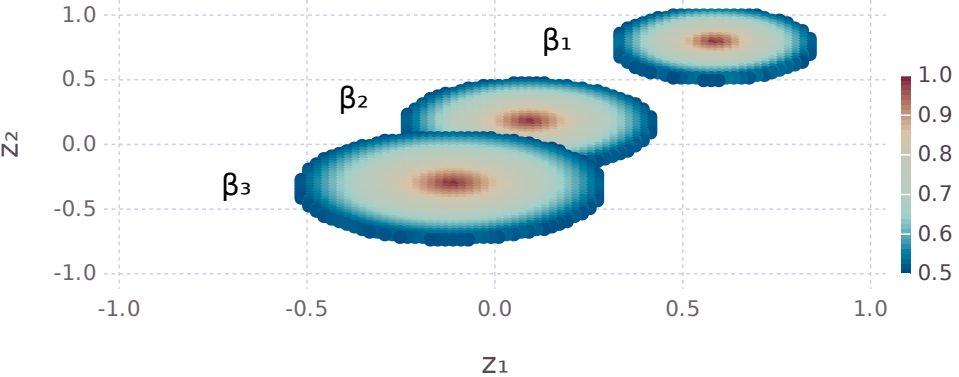

Supplement: supplementary_material [file attachment]

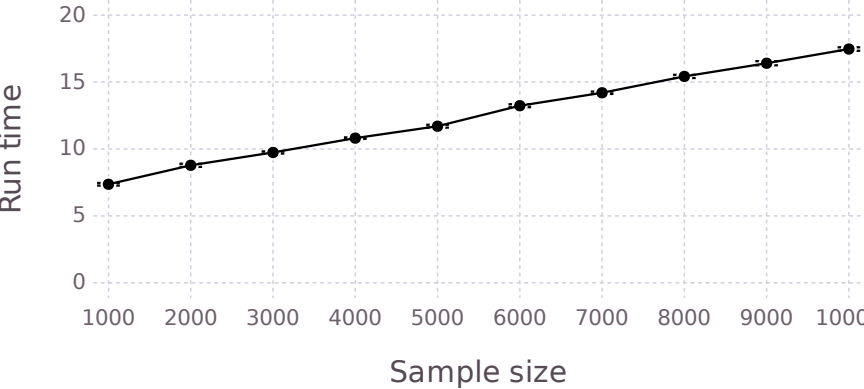

Supplement: supplementary_material [file attachment]

■ Localized lasso ■ Contextual lasso

$p = 10, m = 2$

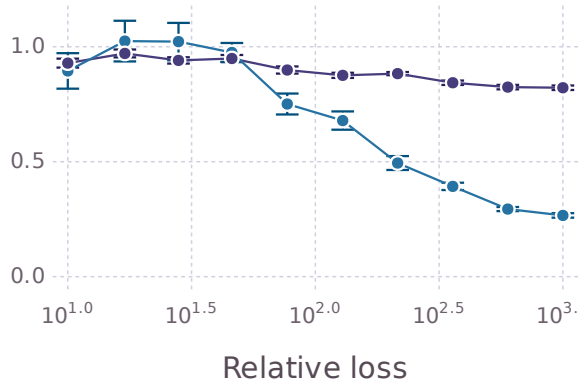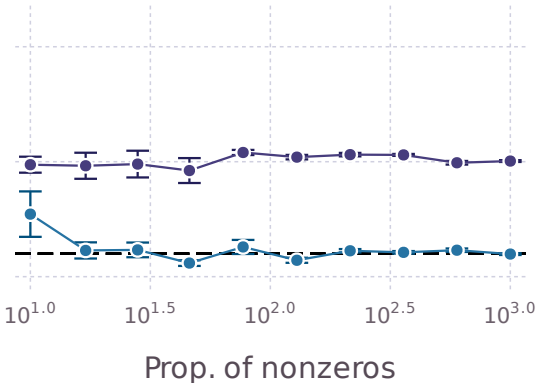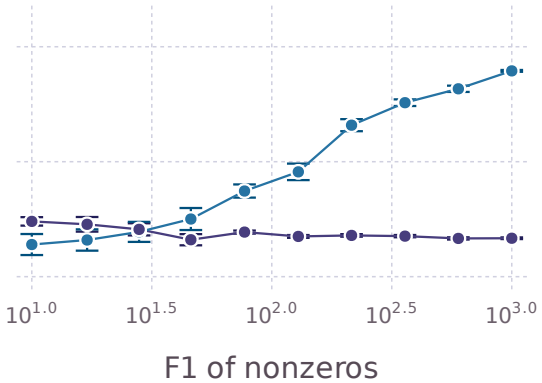

Sample size

Supplement: supplementary_material [file attachment]

Prop. nonzeros

0.4  
0.3  
0.2  
0.1  
0.0

0

5

10

15

20

Hour of day

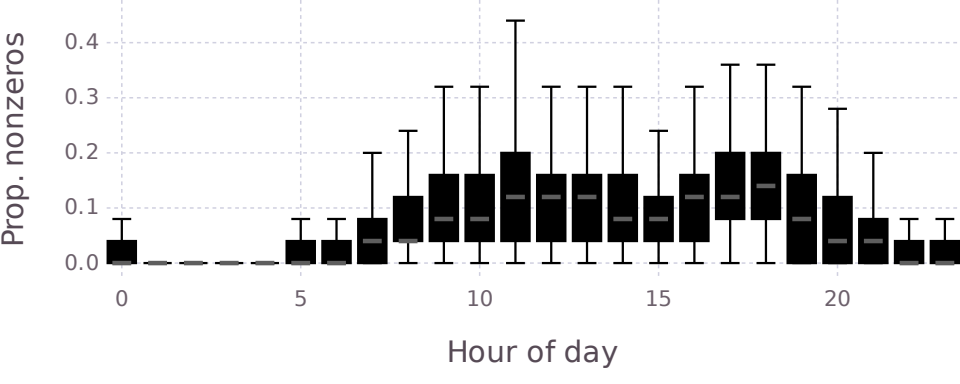

Supplement: supplementary_material [file attachment]

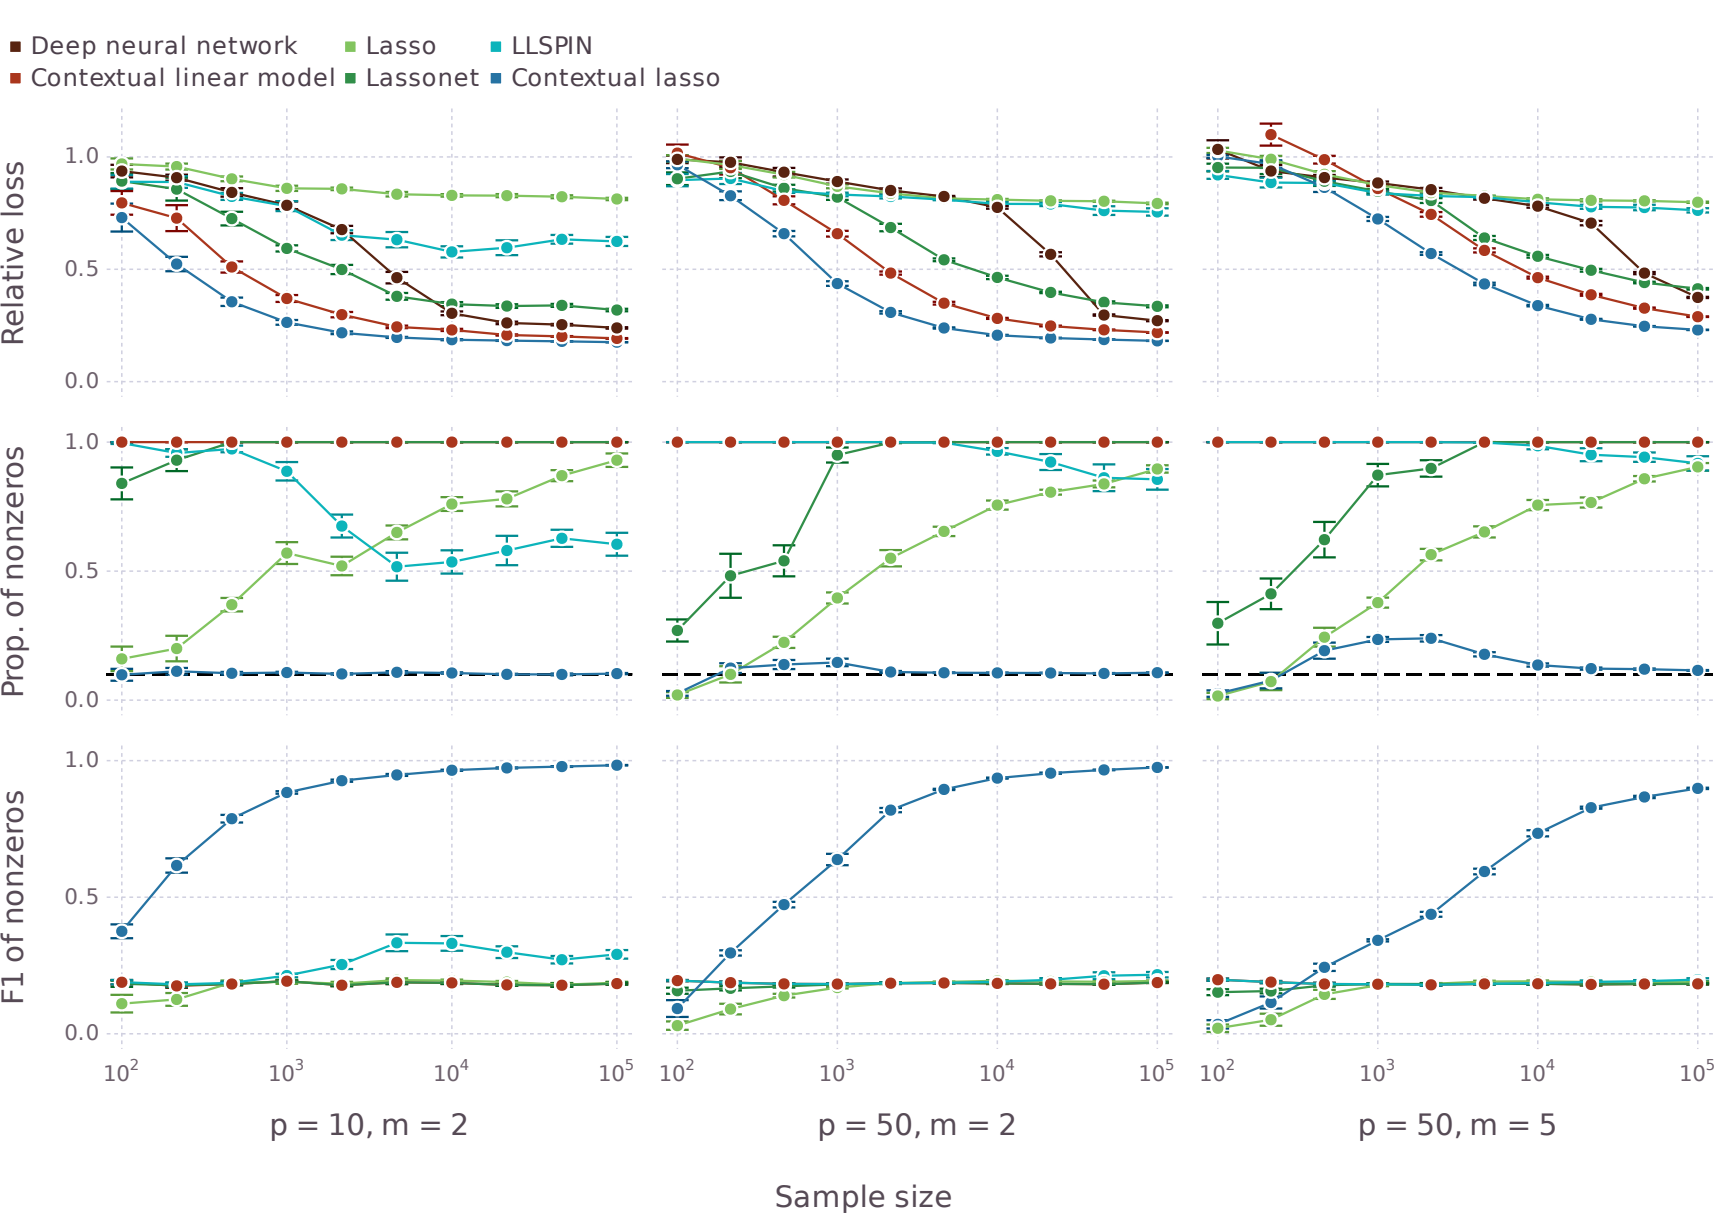

Supplement: supplementary_material [file attachment]

■ Contextual lasso (relaxed) ■ Contextual lasso (non-relaxed)

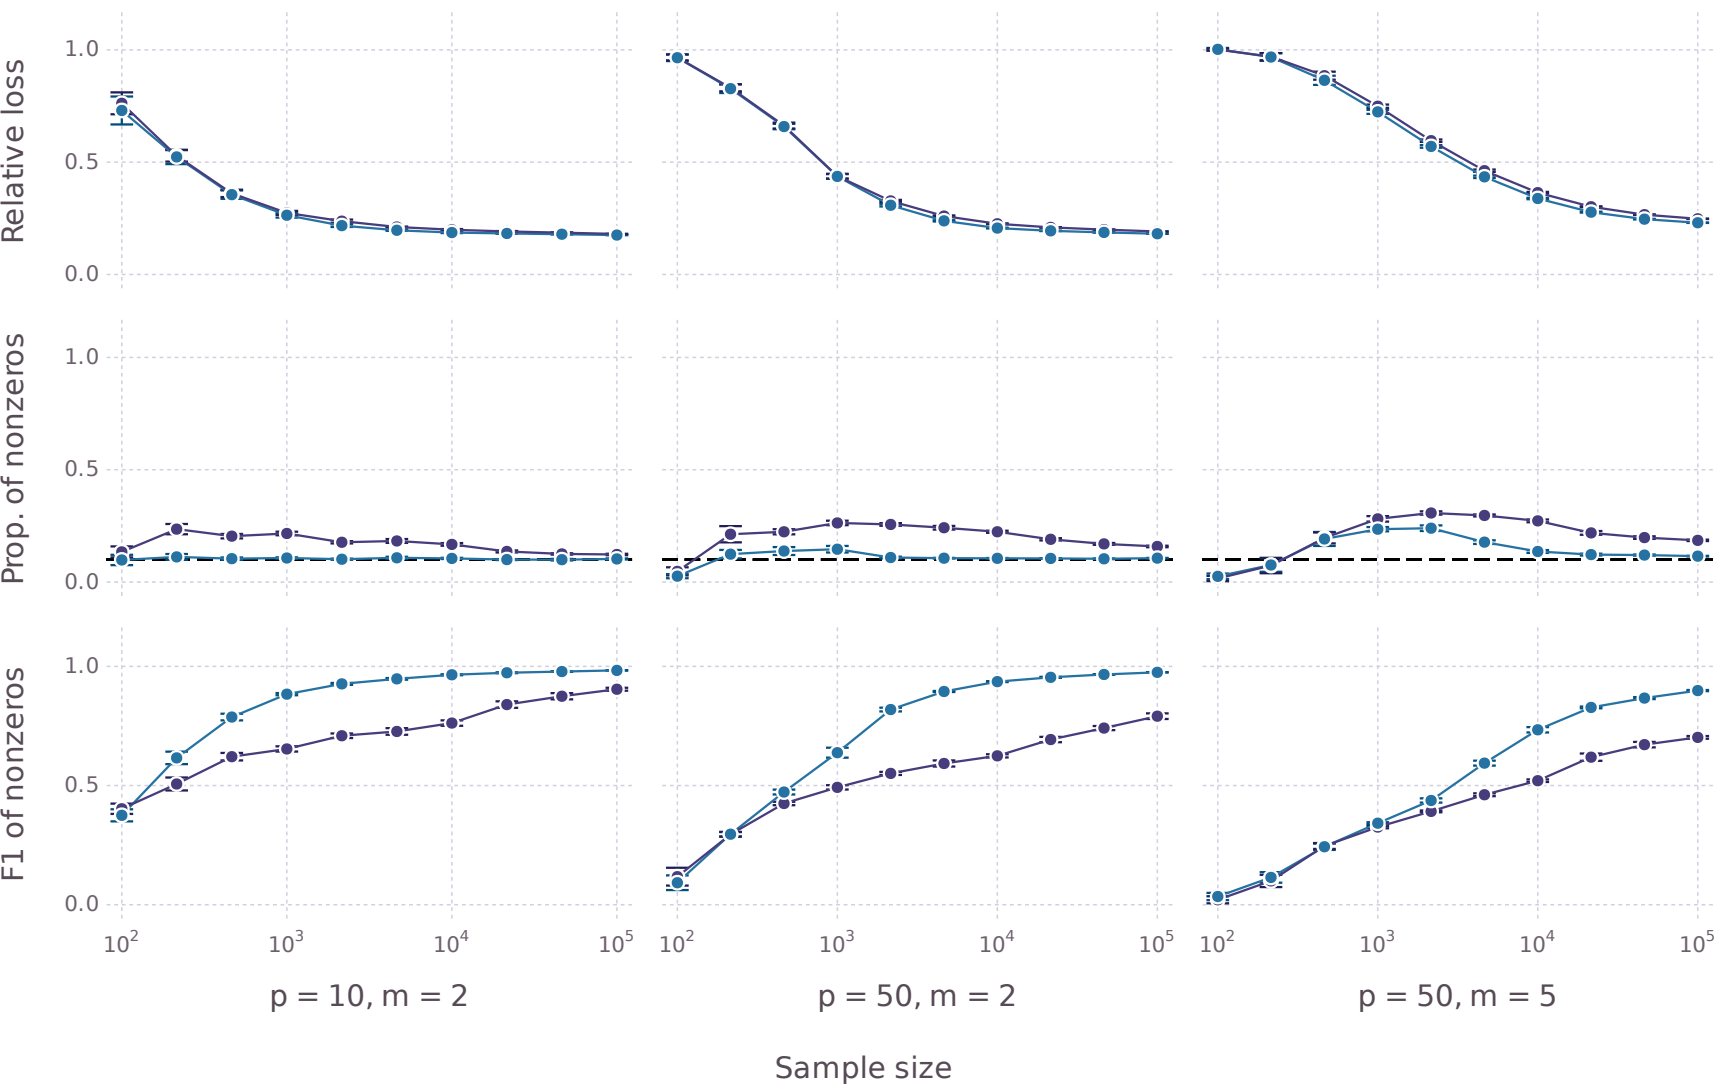

Supplement: supplementary_material [file attachment]

Selection instability

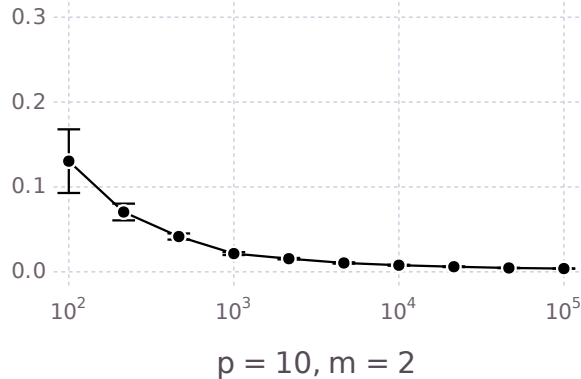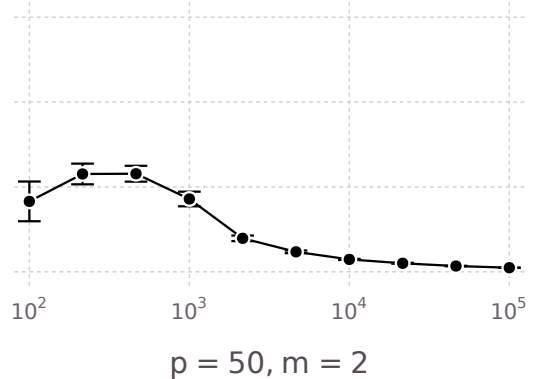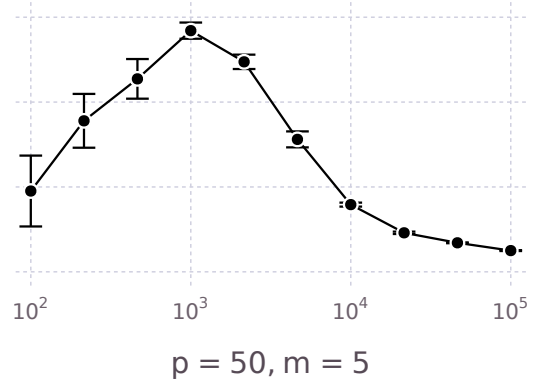

Sample size

Supplement: supplementary_material [file attachment]
